# Supplementary material
Source: Springer Nature journal article supplement (https://www.springermedizin.de/resource/supplementary/13256_2010_1520_MOESM1_ESM.pdf/9647840)
Supplement: MOESM1 [file 9647840]

Seq: SE  
Slice: 5 mm  
Pos: 66  
TR: 610.909  
TE: 14  
AC: 2

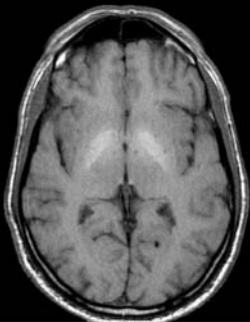

HFS  
FoV: 220 mm  
Image no: 12  
Image 12 of 24  
9-1-2009, 13:49:26

Seq: SE  
Slice: 5 mm  
Pos: 60  
TR: 661.916  
TE: 14  
AC: 2

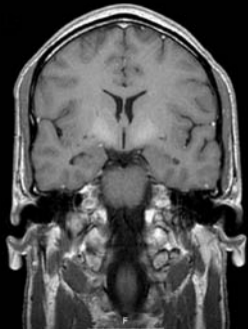

HFS  
FoV: 220 mm  
Image no: 11  
Image 11 of 26  
9-1-2009, 14:03:33
